# Supplementary material for: Development and Validation of a nomogram for Predicting Catheter Dysfunction in Patients Receiving Continuous Renal Replacement Therapy in Intensive Care Units: an observational Cohort Study
Source: Research Square preprint supplement (doi:10.21203/rs.3.rs-6913829/v1), 2025-07-18
Supplement: Supplementary file 1 [file ff43f63e0a3f04f2ea46c02b.pdf]

Supplementary Table 1: Catheter dysfunction data survey questionnaire

| ID Number | Catheter function | Baseline-related Factors                  |                         |                                           |                                   |                                           |          |
|-----------|-------------------|-------------------------------------------|-------------------------|-------------------------------------------|-----------------------------------|-------------------------------------------|----------|
|           |                   | Age (years)                               | Gender(male)            | body mass index (kg/m2)                   | Smoking                           | Hypertension                              | Diabetes |
|           |                   |                                           |                         |                                           |                                   |                                           |          |
|           |                   | Catheter-related Factors                  |                         |                                           |                                   |                                           |          |
|           |                   | Catheter placement history                |                         | Catheter site (Femoral, Internal Jugular) |                                   | Catheter retention time (days)            |          |
|           |                   |                                           |                         |                                           |                                   |                                           |          |
|           |                   | Laboratory-related Factors                |                         |                                           |                                   |                                           |          |
|           |                   | Red blood cell count (10 <sup>9</sup> /L) | Hemoglobin count (g/dL) | Platelet count (10 <sup>9</sup> /L)       | C-reactive Protein count (10mg/L) | Fibrinogen concentration count (g/L)      |          |
|           |                   |                                           |                         |                                           |                                   |                                           |          |
|           |                   | Treatment-related Factors                 |                         |                                           |                                   |                                           |          |
|           |                   | Mechanical ventilation                    | Anticoagulation         | Pre-pump pressure ratio > 0.66            |                                   | Unplanned Discontinuations incidence rate |          |
|           |                   |                                           |                         |                                           |                                   |                                           |          |
